# Supplementary material
Source: PubMed Central journal article supplement (PMC9556447)
Supplement: ajtr0014-6123-f7.pdf [file ajtr0014-6123-f7.pdf]

## DHEA inhibits vascular proliferation and inflammation

**Table S1.** Participant demographics

| Variables            | Non-CVD group (n=9) | CVD group (n=11) | p-Value |
|----------------------|---------------------|------------------|---------|
| Gender (male/female) | 9/0                 | 11/0             | -       |
| Age (years)          | 45.56±9.35          | 42.82±7.43       | 0.474   |

**Table S2.** Primers for real-time PCR

| Gene         | Sense                     | Anti-sense            |
|--------------|---------------------------|-----------------------|
| GAPDH        | AAGGTGAAGGTCGGAGTC        | GATTTTGAGGGATCTCG     |
| PCNA         | AGGGTTGGTAGTTGTCGCTG      | CAAACATGGTGGCGGAGTTG  |
| IL-1 $\beta$ | CAACCAACAAGTGATATTCCTCATG | GATCCACACTCTCCAGCTGCA |
| NLRP3        | CTACGGCCGTCTACGTCTTC      | CAAATTCATCCGCAGCCAG   |

**Table S3.** 3'UTR of NLRP3 contain miR-486a-3p target site or its mutated sequences

| Gene        | Sequences (5'-3')                                              |
|-------------|----------------------------------------------------------------|
| NLRP3-wt-F  | TCGAGTCCCCCGCCCTCCTTACTCCTGCCCTCCTCCTCCTCCTCCG                 |
| NLRP3-wt-R  | TCGACGGAGGAGGAGGAGGAGGAGGGGCAGGAGTAAGAGGAGGGCGGGGAGC           |
| NLRP3-mut-F | TCGAGTCCCCCGCCCTCCTTACTCC <b>CATT</b> TCTCCTCCTCCTCCTCCG       |
| NLRP3-mut-R | TCGACGGAGGAGGAGGAGGAGGAG <b>AAAT</b> GAGGAGTAAGAGGAGGGCGGGGAGC |

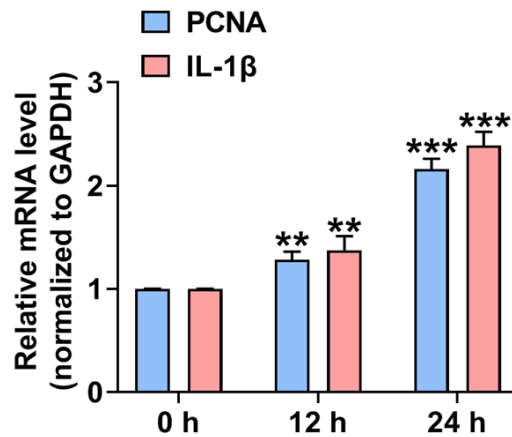

**Figure S1.** VSMCs were treated with Ang II ( $10^{-7}$  mol/L) for the indicated times, qRT-PCR detected the mRNA expression of PCNA and IL-1 $\beta$ . Relative level of their mRNA was presented after normalizing to GAPDH (mean  $\pm$  SEM; n = 3). \*\* $P$  < 0.01 and \*\*\* $P$  < 0.001 vs. 0 h group, respectively.

## DHEA inhibits vascular proliferation and inflammation

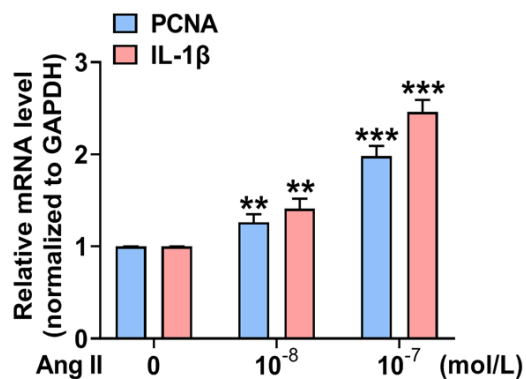

**Figure S2.** VSMCs were treated with different concentrations of Ang II for 24 h, qRT-PCR detected the mRNA expression of PCNA and IL-1 $\beta$ . Relative level of their mRNA was presented after normalizing to GAPDH (mean  $\pm$  SEM; n = 3). \*\* $P$  < 0.01 and \*\*\* $P$  < 0.001 vs. 0 mol/L group, respectively.

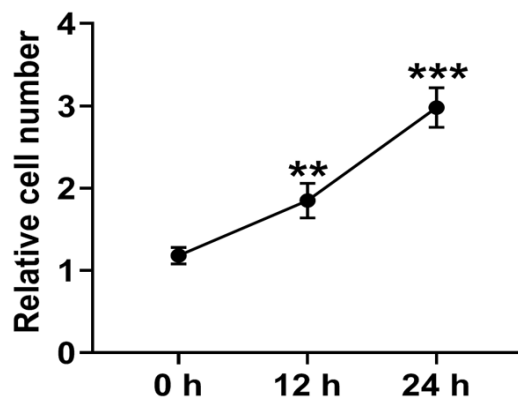

**Figure S3.** VSMCs were treated with Ang II (10<sup>-7</sup> mol/L) for the indicated times. The cell counting was carried out using a Countess automated counter. \*\* $P$  < 0.01 and \*\*\* $P$  < 0.001 vs. 0 h group, respectively.

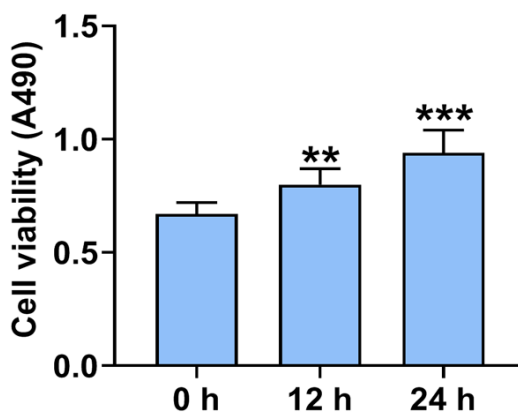

**Figure S4.** VSMCs were treated with Ang II (10<sup>-7</sup> mol/L) for the indicated times. The cell viability was determined by MTS assay. \*\* $P$  < 0.01 and \*\*\* $P$  < 0.001 vs. 0 h group, respectively.

## DHEA inhibits vascular proliferation and inflammation

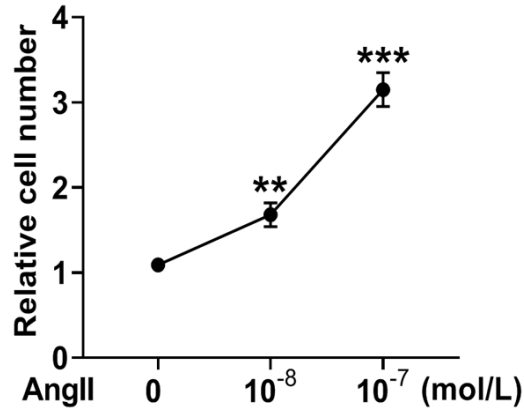

**Figure S5.** VSMCs were treated with different concentrations of Ang II for 24 h. The cell counting was carried out using Countess automated counter. \*\* $P < 0.01$  and \*\*\* $P < 0.001$  vs. 0 mol/L group, respectively.

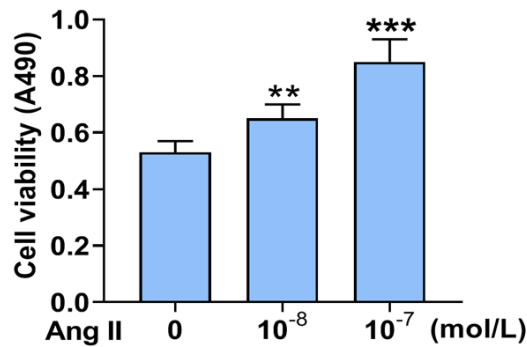

**Figure S6.** VSMCs were treated with different concentrations of Ang II for 24 h. The cell viability was determined by MTS assay. \*\* $P < 0.01$  and \*\*\* $P < 0.001$  vs. 0 mol/L group, respectively.

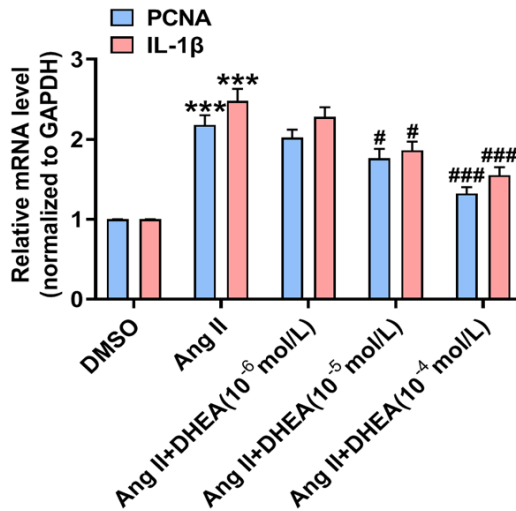

**Figure S7.** VSMCs were stimulated with DMSO, Ang II (10<sup>-7</sup> mol/L), or Ang II (10<sup>-7</sup> mol/L) plus various concentrations of DHEA for 24 h. The expression of PCNA and IL-1β mRNA was analyzed by qRT-PCR. Relative level of their mRNA was presented after normalizing to GAPDH (mean ± SEM; n=3). \*\*\* $P < 0.001$  vs. DMSO group, # $P < 0.05$ , ### $P < 0.001$  vs. Ang II group, respectively.
